# Supplementary material for: A novel ADOA-associated OPA1 mutation alters the mitochondrial function, membrane potential, ROS production and apoptosis
Source: PubMed Central journal article supplement (PMC5515948; doi:10.1038/s41598-017-05571-y), 2017-07-18
Supplement: 41598_2017_5571_MOESM1_ESM.pdf [file 41598_2017_5571_MOESM1_ESM.pdf]

**A novel ADOA-associated *OPA1* mutation alters the mitochondrial function, membrane potential, ROS production and apoptosis**

Juanjuan Zhang<sup>1,2,3,+</sup>, Xiaoling Liu<sup>3,+</sup>, Xiaoyang Liang<sup>2</sup>, Yuanyuan Lu<sup>4</sup>, Ling Zhu<sup>1,2</sup>, Runing Fu<sup>3,4</sup>, Yanchun Ji<sup>1,2</sup>, Wenlu Fan<sup>3</sup>, Jie Chen<sup>3</sup>, Bing Lin<sup>3</sup>, Yimin Yuan<sup>3,4</sup>, Pingping Jiang<sup>1,2</sup>, Xiangtian Zhou<sup>3,\*</sup> and Min-Xin Guan<sup>1,2,5,\*</sup>

<sup>1</sup>Division of Medical Genetics and Genomics, Zhejiang Children's Hospital, Zhejiang University School of Medicine, Hangzhou, Zhejiang, 310058 China.

<sup>2</sup>Institute of Genetics, Zhejiang University School of Medicine, Hangzhou, Zhejiang, 310058 China.

<sup>3</sup>School of Ophthalmology and Optometry, Wenzhou Medical University, Wenzhou, Zhejiang, 325027 China.

<sup>4</sup>Attardi Institute of Mitochondrial Biomedicine, Wenzhou Medical University, Wenzhou, Zhejiang, 325035 China.

<sup>5</sup>Collaborative Innovation Center for Diagnosis and Treatment of Infectious Diseases, Zhejiang University, Hangzhou, Zhejiang 310058, China

**\*To whom correspondences should be:** Min-Xin Guan, Ph.D, Institute of Genetics, Zhejiang University School of Medicine, Hangzhou, Zhejiang, China; Telephone: (571) 88206916; Fax: (571) 88982377; E-mail: gminxin88@zju.edu.cn.

Xiangtian Zhou, MD, School of Ophthalmology and Optometry, Wenzhou Medical University, Wenzhou, Zhejiang, China, E-mail: zxt-dr@wz.zj.cn.

<sup>+</sup>J. Zhang and X. Liu contributed equally to this work.

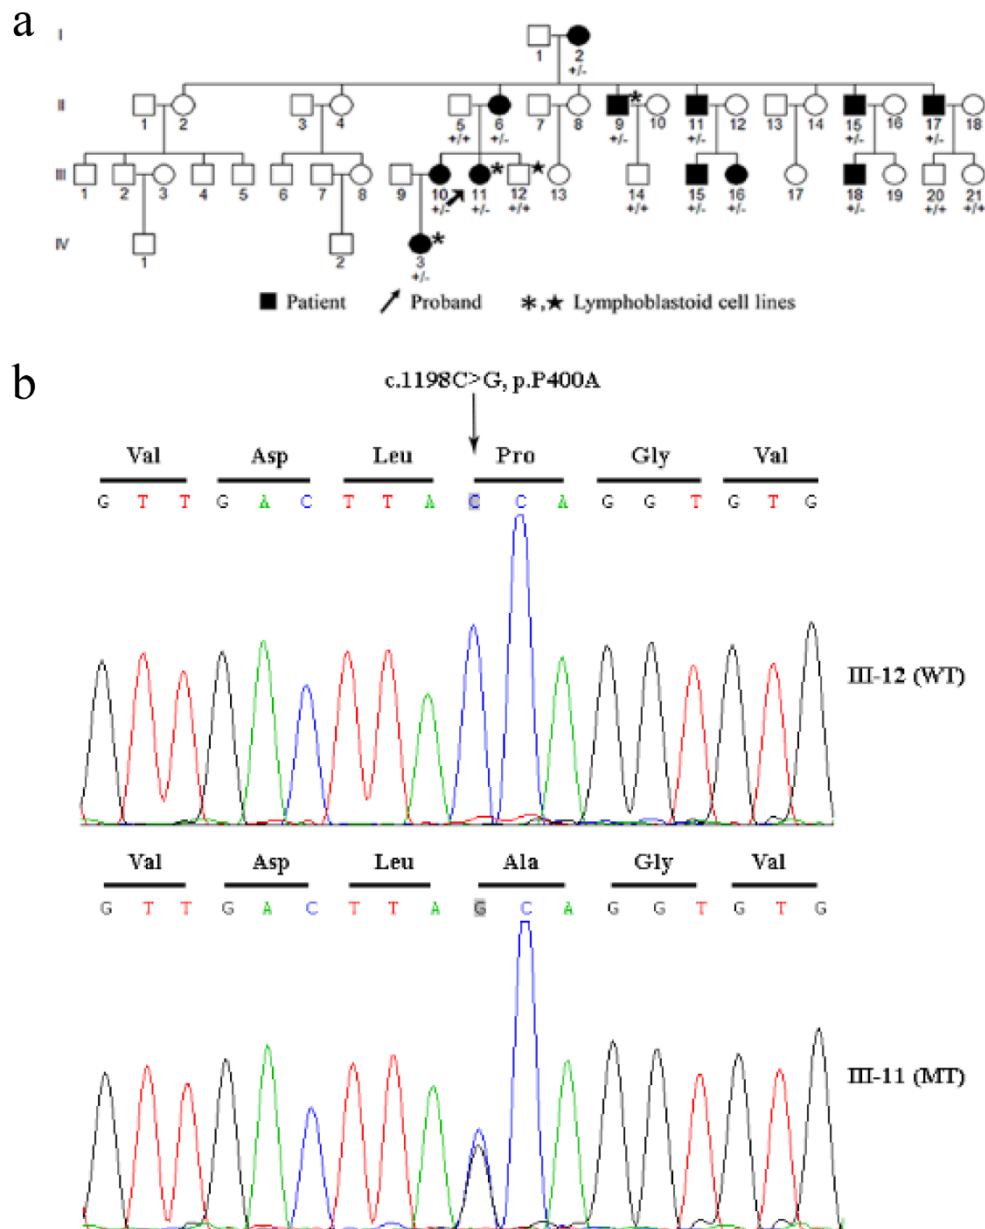

**Supplementary Figure 1. Construction of lymphoblastoid cell lines and identification of cell lines.** (a) Genotype analysis of the Chinese pedigree. Filled symbols: individuals with visual impairment, arrow indicated the proband; +/+ : homozygote; +/- : heterozygote; \*, Construction of lymphoblastoid cell lines. (b) Partial sequence chromatograms of the *OPA1* gene from lymphoblastoid cell lines of affected individual III-11 and the married-in control subject III-11. Arrow: location of the base changes at position 400.

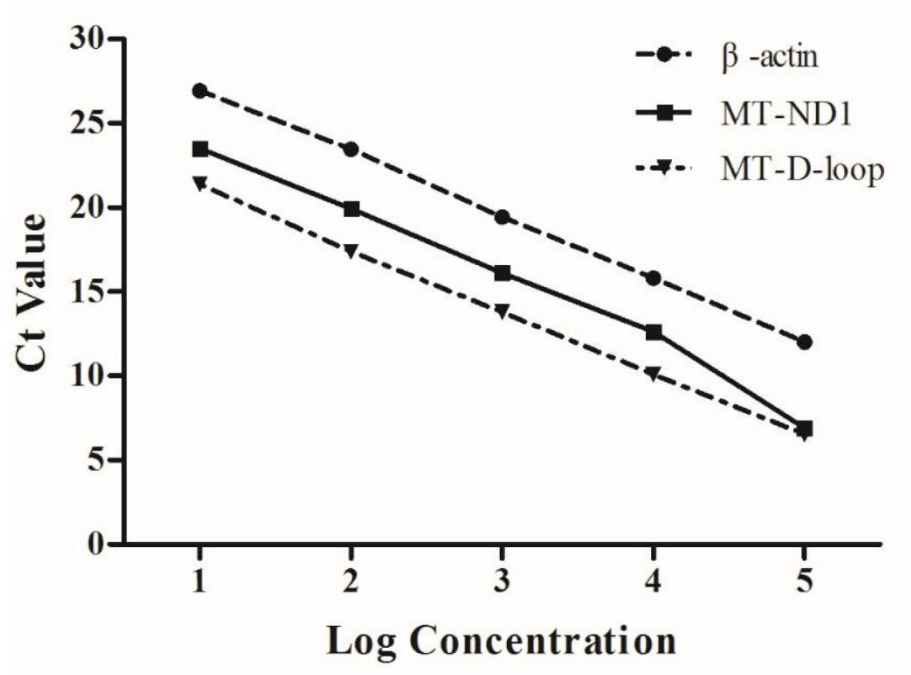

**Supplementary Figure 2. Standard curves of primers in QPCR.** The standard curves were drawn with a ten-fold dilution series ( $10^0$ - $10^4$ ) of reference DNA.

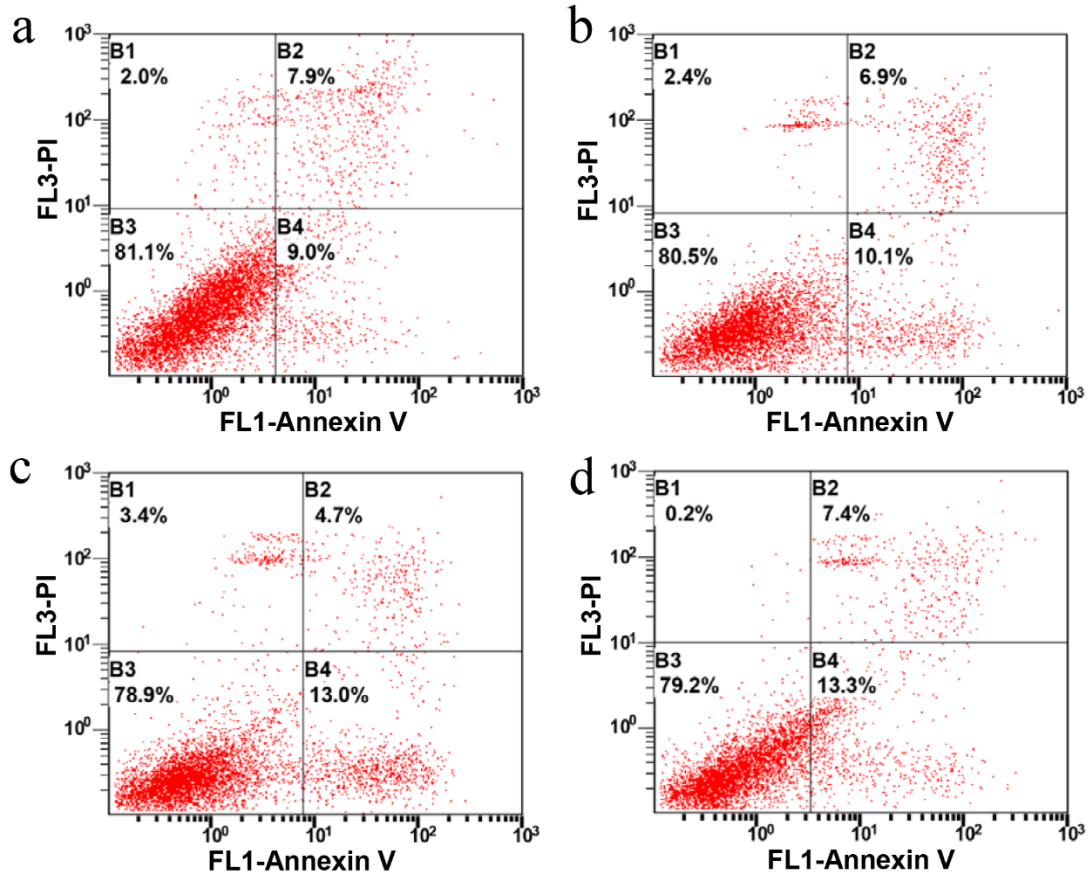

**Supplementary Figure 3. The ratio of apoptotic cells from the third to sixth generation.** Flow cytometric analysis of the third to sixth generation cells stained with both PI and annexin V-FITC to demonstrate the ratio of later stage apoptosis and early necrosis.
